# Supplementary material for: Information for genetic management of mtDNA disease: sampling pathogenic mtDNA mutants in the human germline and in placenta
Source: HighWire-hosted journal article supplement (doi:10.1136/jmg.2009.072900), 2009-11-12
Supplement: JMG_ConsentForm_072900_.pdf [file JMG_ConsentForm_072900_.pdf]

## Consent form

**For a patient's consent to publication of information about them in BMJ Publishing Group Ltd ("BMJ Group") publications and products.**

Name of person described in article or shown in photograph: Julia McLellan

Subject matter of photograph or article: ANALYSIS OF OOCYTES

Journal name: Journal of Medical Genetics

Manuscript number: 2009/072900

Title of article: INFORMATION FOR GENETIC MANAGEMENT...

Corresponding author: J Poulton

I JULIA MCELLEAN [insert full name] give my consent for this information about (MYSELF/MY CHILD OR WARD/MY RELATIVE [circle correct description] relating to the subject matter above ("the Information") to appear in the journal and associated publications.\*

***I have seen and read the material to be submitted to the journal***

I understand the following:

- (1) The Information will be published without my name attached and BMJ Group will make every attempt to ensure my anonymity. I understand, however, that complete anonymity cannot be guaranteed. It is possible that somebody somewhere - perhaps, for example, somebody who looked after me if I was in hospital or a relative - may identify me.
- (2) The text of the article will be edited for style, grammar, consistency, and length
- (3) The Information may be published in the journal, which is distributed worldwide. The journal goes mainly to doctors but is seen by many non-doctors, including journalists.
- (4) The Information will also be placed on the journal website, <http://group.bmj.com/products>
- (5) \*The Information may also be used in full or in part in other publications and products published by the BMJ Group or by other publishers to whom the BMJ Group licenses its content. This includes publication in English and in translation, in print, in electronic formats, and in any other formats that may be used by the BMJ Group or its licensees now and in the future. In particular the Information may appear in local editions of the journal or other journals and publications published overseas.
- (6) The BMJ Group will not allow the Information to be used for advertising or packaging or to be used out of context.
- (7) I can revoke my consent at any time before publication, but once the Information has been committed to publication ("gone to press") it will not be possible to revoke the consent.

Signed: Julia McLellan

Date: 8.9.09
